# Supplementary material for: On the occurrence of annual layers in Dome Fuji ice core early Holocene ice
Source: Copernicus journal article supplement (doi:10.5194/cp-11-1127-2015), 2015-09-15
Supplement: Supplementary file 1 [file cp-11-1127-2015-supplement.pdf]

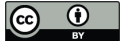

## *Supplement of*

# **On the occurrence of annual layers in Dome Fuji ice core early Holocene ice**

**A. Svensson et al.**

*Correspondence to:* A. Svensson (as@gfy.ku.dk)

The copyright of individual parts of the supplement might differ from the CC-BY 3.0 licence.

On the occurrence of annual layers in Dome Fuji ice core early Holocene ice

Supplement

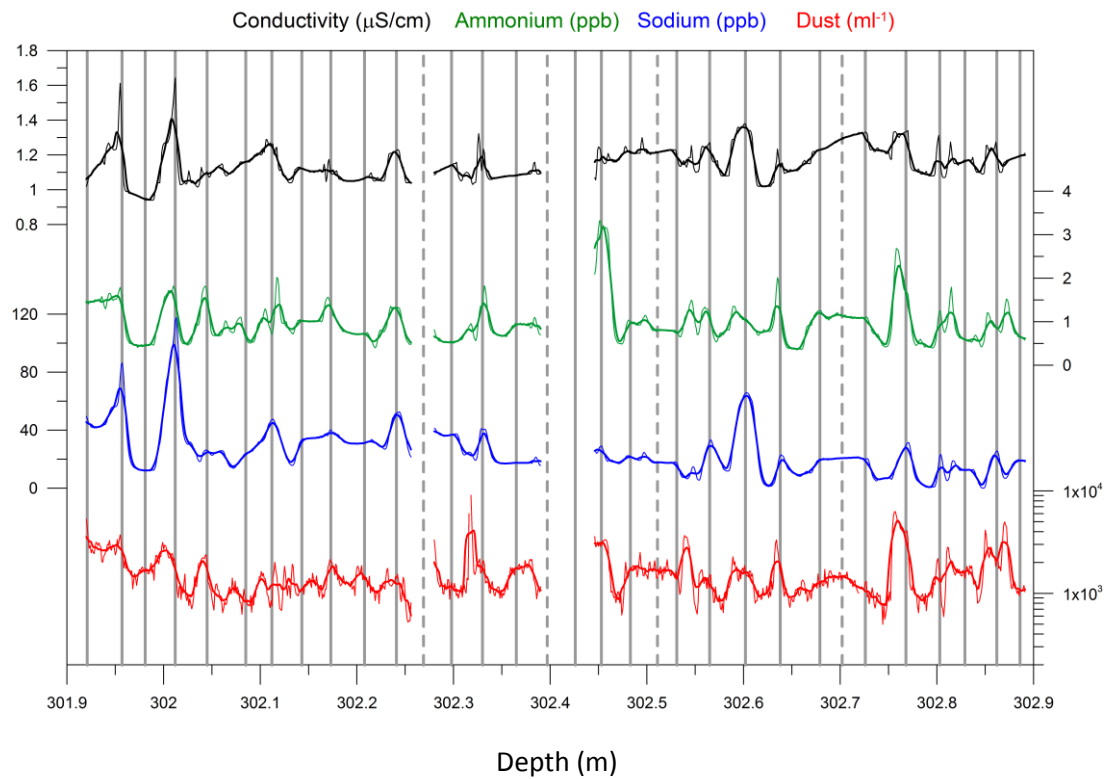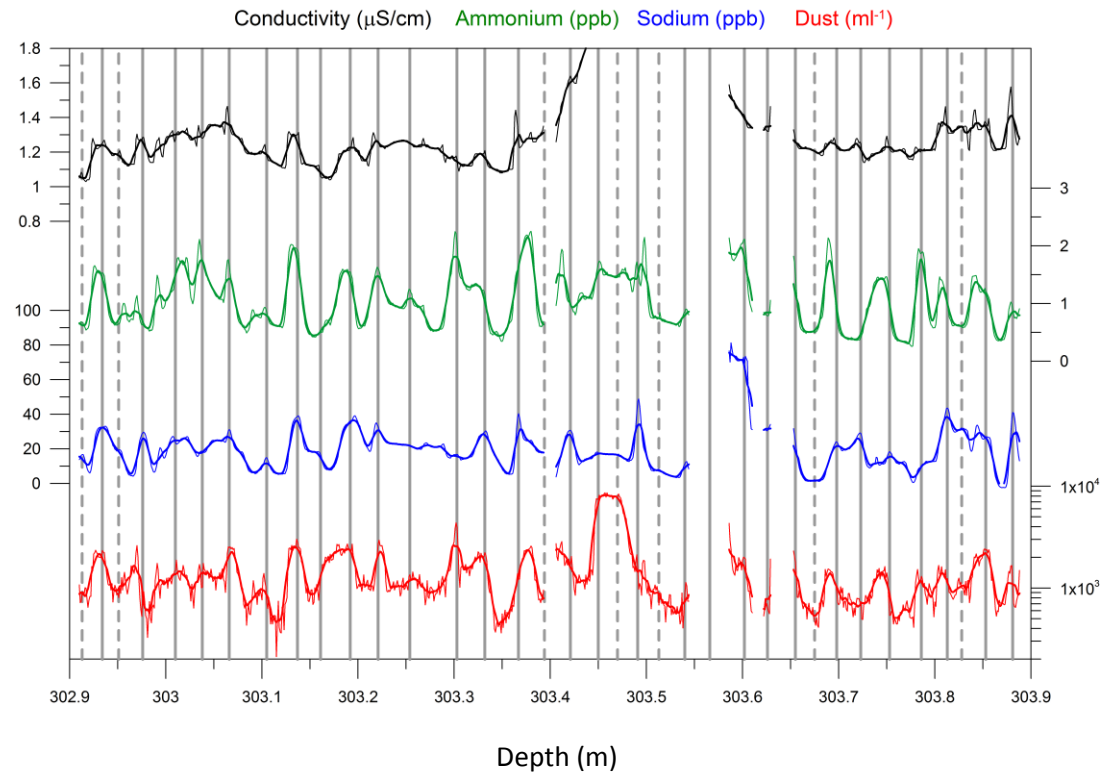

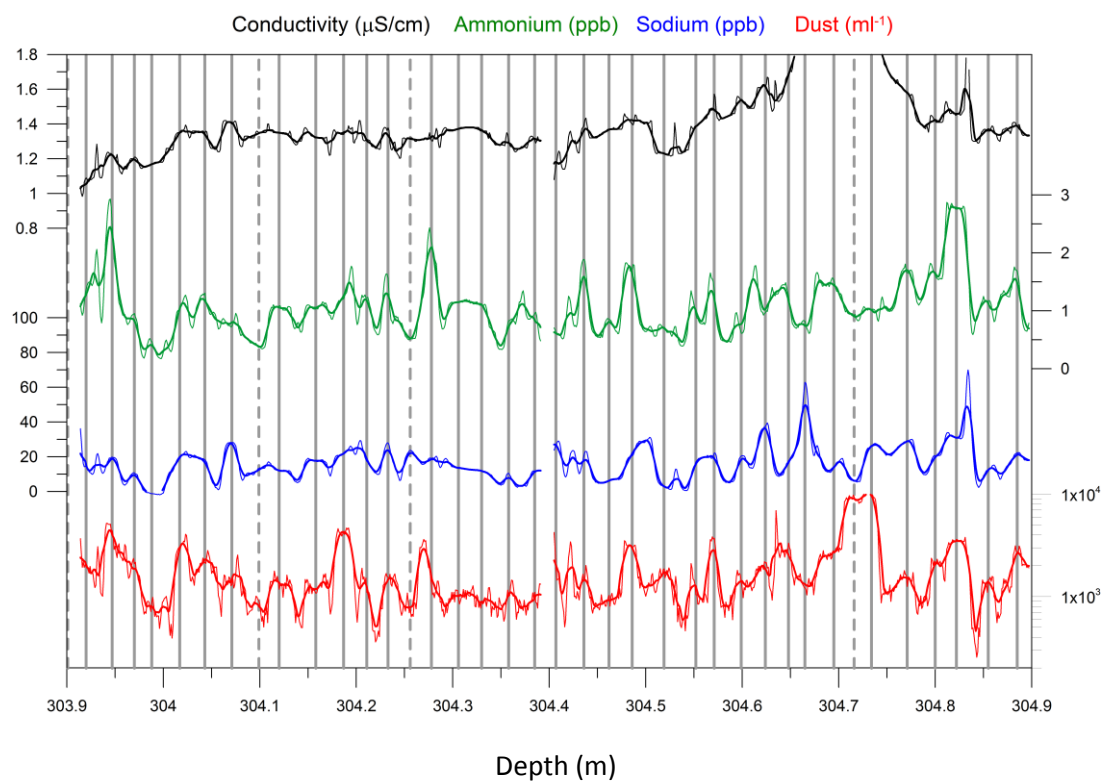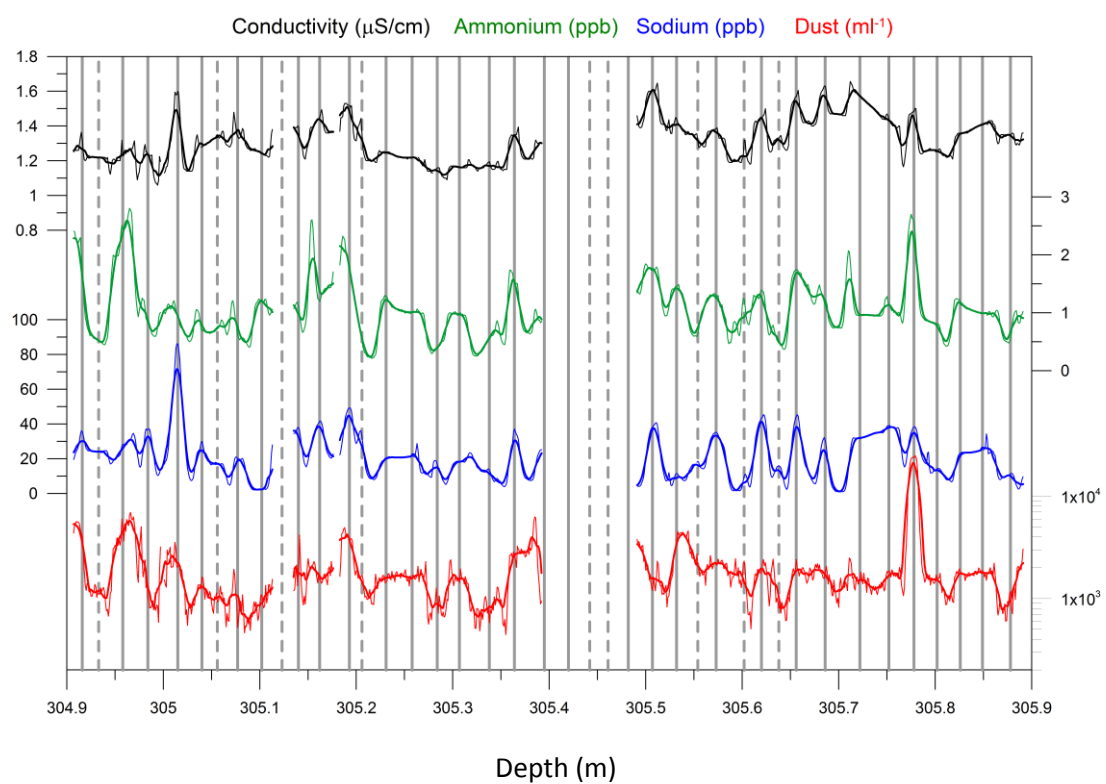

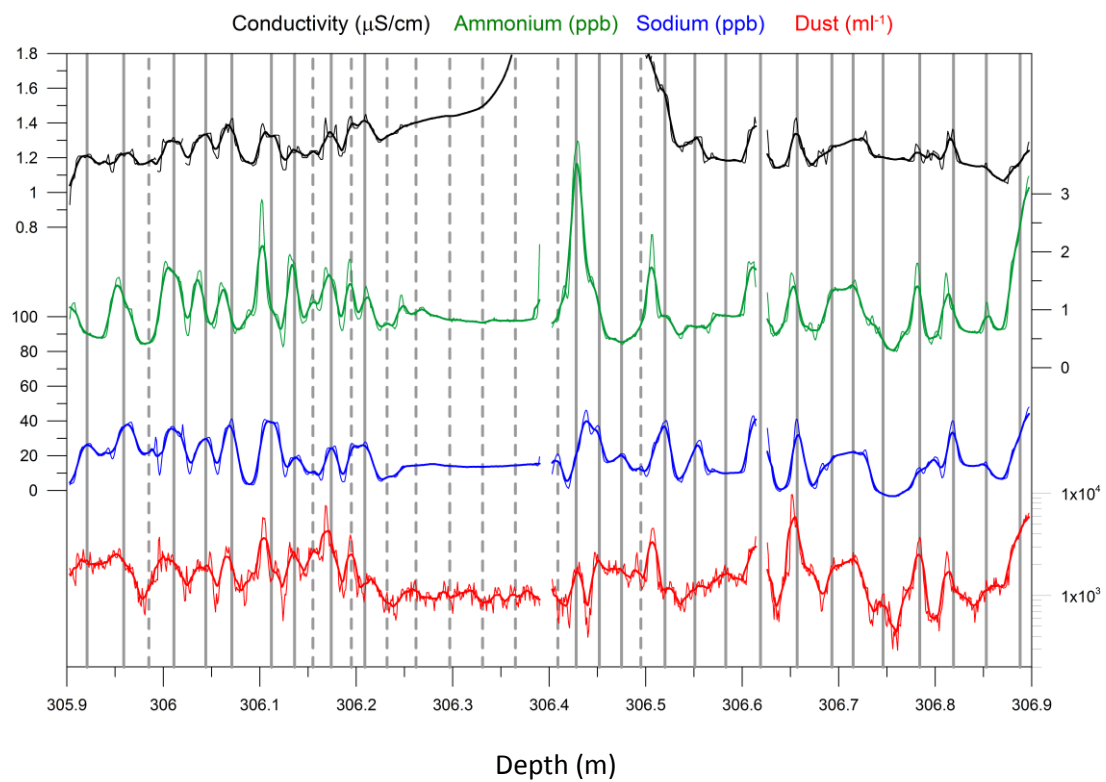

Figures S1-S5 showing the analysed 5 m of CFA records in high resolution including suggested layer marks.

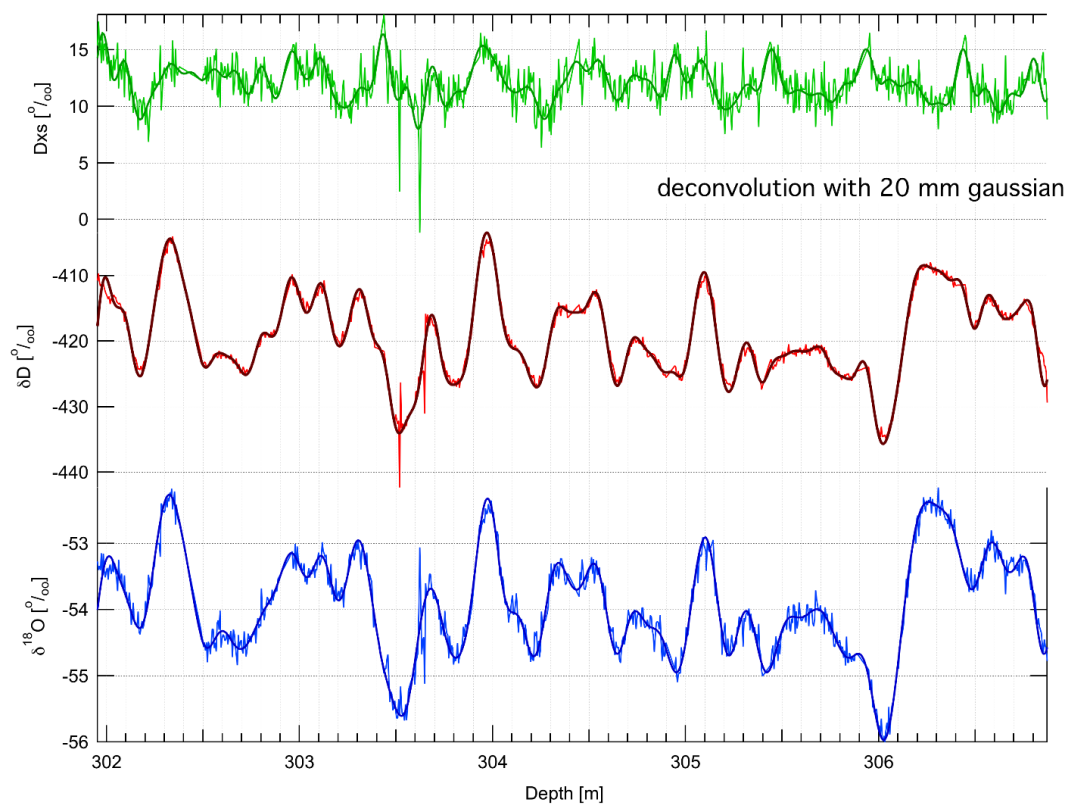

Figure S6. Continuously measured water isotopes  $\delta^{18}\text{O}$  and  $\delta\text{D}$  as well as the derived deuterium excess (Dxs).
